# Supplementary material for: Optimizing Diffusive Transport Through a Synthetic Membrane Channel
Source: PubMed Central journal article supplement (PMC3594580; doi:10.1002/adma.201203500), 2012-11-15
Supplement: adma0025-0844-sd4.pdf [file adma0025-0844-sd4.pdf]

Copyright WILEY-VCH Verlag GmbH & Co. KGaA, 69469 Weinheim, Germany, 2012.

# **ADVANCED MATERIALS**

## Supporting Information

for *Adv. Mater.*, DOI: 10.1002/adma.201203500

**Optimizing Diffusive Transport Through a Synthetic  
Membrane Channel**

*Stefano Pagliara, Christian Schwall, and Ulrich F. Keyser \**

DOI: adma.201203500

## Optimizing diffusive transport through a synthetic membrane channel

Supporting Information

By *Stefano Pagliara, Christian Schwall and Ulrich F. Keyser\**

[\*] Dr. Ulrich F. Keyser, Dr. Stefano Pagliara, Christian Schwall  
 Cavendish Laboratory, University of Cambridge, JJ Thomson Ave  
 Cambridge, CB3 0HE, UK

E-mail: [ufk20@cam.ac.uk](mailto:ufk20@cam.ac.uk)

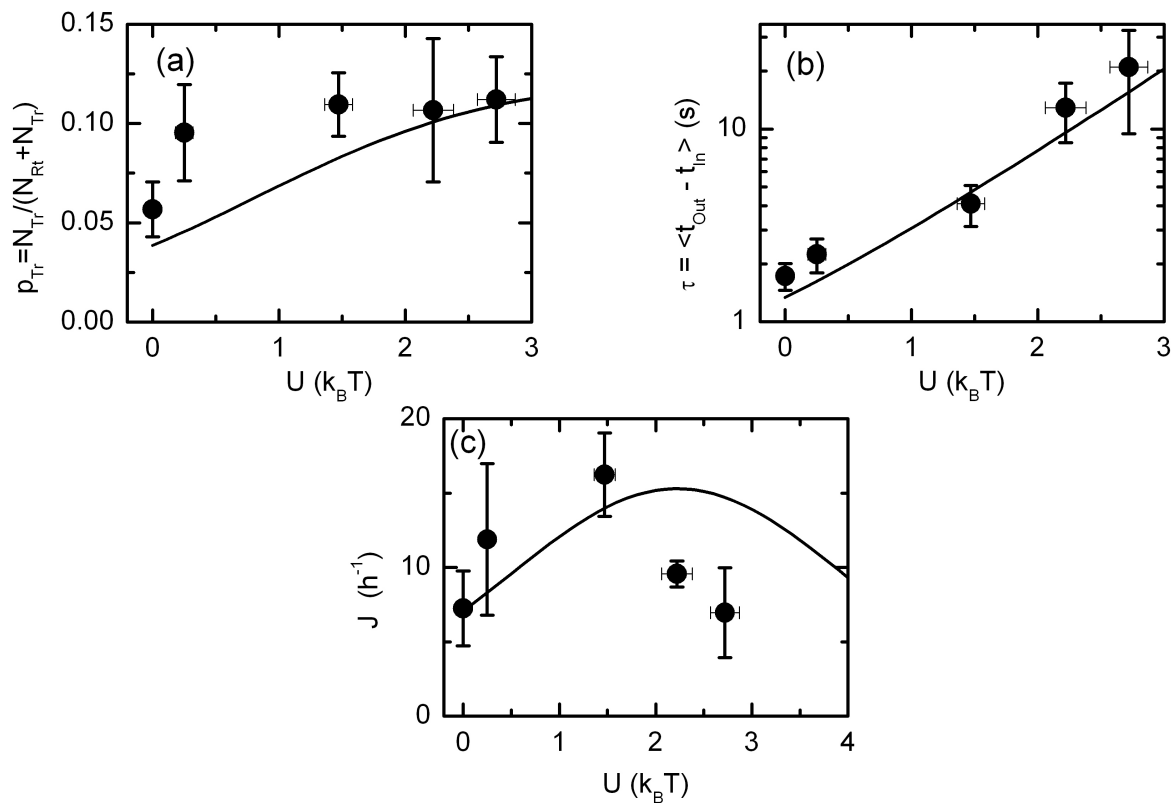

**Figure S1** Dependence of the translocation probability  $p_{Tr}$  (a), lifetime  $\tau$  (b) and diffusion current  $J$  (c) with respect to the average potential well depth as measured by considering the channel blocked when one particle occupies it. In case the channel is occupied we do not count further particles entering.
